# 1 Long-lived rodents reveal signatures of positive selection 2 in genes associated with lifespan and eusociality

---

3 Arne Sahm<sup>1\*</sup>, Martin Bens<sup>1</sup>, Karol Szafranski<sup>1</sup>, Susanne Holtze<sup>2</sup>, Marco Groth<sup>1</sup>, Matthias Görlach<sup>1</sup>,  
4 Cornelis Calkhoven<sup>3</sup>, Christine Müller<sup>3</sup>, Matthias Schwab<sup>4</sup>, Hans A. Kestler<sup>1,5</sup>, Alessandro Cellerino<sup>1,6</sup>,  
5 Hynek Burda<sup>7</sup>, Thomas Hildebrandt<sup>2</sup>, Philip Dammann<sup>7,8</sup>, Matthias Platzer<sup>1</sup>

6 <sup>1</sup> Leibniz Institute on Aging – Fritz Lipmann Institute, Jena, Germany.

7 <sup>2</sup> Department of Reproduction Management, Leibniz Institute for Zoo and Wildlife Research, Berlin,  
8 Germany.

9 <sup>3</sup> European Research Institute for the Biology of Ageing, University of Groningen, University Medical  
10 Centre Groningen Groningen, The Netherlands.

11 <sup>4</sup> Department of Neurology; Jena University Hospital-Friedrich Schiller University, Jena, Germany.

12 <sup>5</sup> Institute of Medical Systems Biology, Ulm University, Ulm, Germany.

13 <sup>6</sup> Laboratory of Biology Bio@SNS, Scuola Normale Superiore, Pisa, Italy.

14 <sup>7</sup> Department of General Zoology, Faculty of Biology, University of Duisburg-Essen, Essen, Germany.

15 <sup>8</sup> University Hospital, University of Duisburg-Essen, Essen, Germany.

16 \* To whom correspondence should be addressed. Tel: +49 3641 656050; Fax: +49 3641 656255;

17 Email: [arne.sahm@leibniz-fli.de](mailto:arne.sahm@leibniz-fli.de); Present Address: Arne Sahm, Genome Analysis, Leibniz Institute on  
18 Aging, Fritz Lipmann Institute, Jena, Thuringia, 07745, Germany.

19

## 20 **Abstract**

21 The genetic mechanisms that determine lifespan are poorly understood. Most research has been  
22 done on short lived animals and it is unclear if these insights can be transferred to long-lived  
23 mammals like humans. Some African mole-rats (Bathyergidae) have life expectancies that are  
24 multiple times higher than similar sized and phylogenetically closely related rodents. We obtained  
25 genomic and transcriptomic data from 17 rodent species and systematically scanned eleven lineages  
26 associated with the evolution of longevity and eusociality for positively selected genes (PSGs). The  
27 set of 319 PSGs contains regulators of mTOR and is enriched in functional terms associated with (i)  
28 processes that are regulated by the mTOR pathway, e.g. translation, autophagy and mitochondrial  
29 biogenesis, (ii) the immune system and (iii) antioxidant defense. Analyzing gene expression of PSGs  
30 during aging in the long-lived naked mole-rat and up-regulation in the short-lived rat, we found a  
31 pattern fitting the antagonistic pleiotropy theory of aging.

## 32 **Introduction**

33 Most of the available information about the genetic mechanisms that govern lifespan and aging were  
34 obtained by studying single-gene mutations in invertebrates or short-lived, highly inbred vertebrate  
35 species. However, it is not clear whether insights about aging relevant genes and pathways gained  
36 from these species can be applied to long-lived species like human <sup>1</sup>. In addition, lifespan extensions  
37 under artificial laboratory conditions resulting from single gene mutations or other genetic,  
38 pharmacologic and/or lifestyle interventions are far smaller than natural variation of lifespan among  
39 species shaped by natural selection. Moreover, it is not clear to what extent genetic variation is  
40 responsible for intraspecific heritable differences in lifespan overlaps with the genetic architecture of  
41 lifespan macroevolution. As a case in point, maximum lifespan in captivity varies about two orders of  
42 magnitude and is positively correlated with body mass in vertebrates <sup>2,3</sup>, but the two traits are  
43 negatively correlated within species, the most extreme example being dog breeds <sup>4</sup>. Therefore,

44 comparative evolutionary approaches that search for genetic differences between closely related  
45 species that are short- and long-lived with respect to their body mass may reveal novel candidate  
46 genes and pathways or open new perspectives on known ones.

47 Rodents are an ideal taxon for such an approach. While the majority of species is short-lived, such as  
48 mice, rats and hamsters, there are long-lived exceptions, such as chinchillas, blind mole rats (BMR,  
49 *Spalax* sp.) and several African mole-rat species including the naked mole-rat (NMR, *Heterocephalus*  
50 *glaber*)<sup>5,6</sup>. Furthermore, genome and transcriptome sequences of short- and long-lived species are  
51 available and can be used for comparative analysis.

52 African mole-rats (family Bathyergidae) are subterranean rodents that feed from roots and tubers.  
53 The family comprises six genera; for five out of these, maximum lifespan records are available for at  
54 least one species. Notably, and in contrast to most other rodents, none of these species has a  
55 maximum lifespan of below ten years or below the predictions of the power-law that describes body  
56 mass/lifespan relationships in mammals<sup>6</sup>. At the extreme of this distribution, Zambian mole-rats  
57 from the *Fukomys micklemi* clade<sup>7</sup> (the best studied representative being the Ansell's mole-rat *F.*  
58 *anselli*, AMR), the giant mole-rat (GMR, *Fukomys mechowii*) and NMR, have maximum lifespans of at  
59 least ca. 20, 22 and 31 years, respectively. These values are 212%, 194% and 368% with respect to  
60 the predicted lifespan based on their body mass<sup>5</sup>, GMR percentage calculated with own lifespan  
61 data and same formula). In contrast, the established biomedical model organisms rat (*Rattus*  
62 *norvegicus*) and mouse (*Mus musculus*) have a maximum lifespan of 3.8 and 4 years, respectively,  
63 which is 32% and 51% of the predicted value. Remarkably, the greater cane rat (*Thryonomys*  
64 *swinderianus*) that is closely related to the African mole-rats reaches only 28% of the predicted  
65 maximum lifespan<sup>5</sup> (Fig. 1).

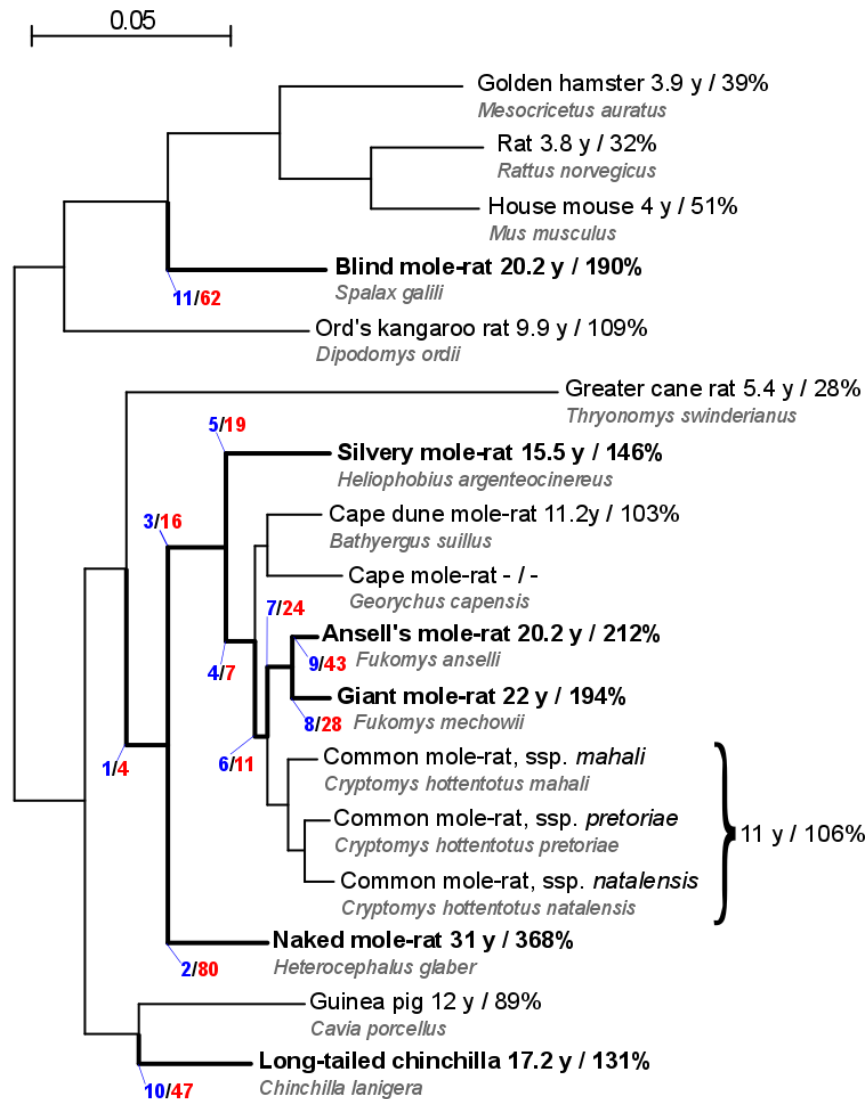

66  
67  
68 **Figure 1.** Nucleotide-based phylogeny of the analyzed rodents. Species or branches regarded in the  
69 present analyses as long-lived or leading to longevity, respectively, are depicted in bold. The branch  
70 numbers used in the text are shown in blue. The numbers of genes with signs of positive selection on  
71 the branches are colored in red. The first number after the species name shows the recorded  
72 maximum lifespan and the second number is the percentage of the observed vs. expected maximum  
73 lifespan based on the respective body mass. The maximum lifespans and ratios were taken from <sup>5</sup>,  
74 except for silvery mole-rat (personal communication by R. Sumbera) and giant mole rat (own data).  
75 For these two species, the expected maximum lifespans were calculated with the same mammalian  
76 allometric equation used by <sup>5</sup>. The scale bar represents 0.05 substitutions per site.

77

78 Due to a number of unique phenotypes, the NMR became the focus of intensive research<sup>8</sup>. It was  
79 the first vertebrate for which eusociality was discovered<sup>9</sup>. The NMR shows (i) the longest lifespan  
80 among rodents, (ii) no aging-related decline in reproductive and physiological parameters, as well as  
81 (iii) no observable aging-related increase in mortality rate<sup>10</sup>. Among thousands of examined animals  
82 only six recently discovered cases of spontaneous tumors have been described<sup>11,12</sup>. Interestingly,  
83 cancer resistance is shared with BMR, which is also long-lived but, despite its name, rather distantly  
84 related to African mole-rats (Fig. 1). However, different mechanisms are proposed for cancer  
85 resistance in these two taxa. While high-mass hyaluronan mediated early contact inhibition was  
86 suggested as a key player in NMR<sup>13</sup>, a concerted necrotic cell death mechanism in response to  
87 hyperproliferation was proposed for BMR<sup>14</sup>.

88 The search for signatures of positive selection represents a powerful approach to identify the genetic  
89 basis of these unique biological features. Positive selection is the fixation of an allele in a taxon  
90 driven by its positive effect on fitness. Once an adaptive phenotype evolved in a given species or  
91 evolutionary clade, some of the genes under positive selection likely play a role in it. In protein-  
92 coding sequences (CDSs), positive selection results in an increased rate of non-synonymous  
93 substitutions as compared to genetic drift. Statistical models based on the ratio of non-synonymous  
94 to synonymous substitution rates ( $d_N/d_S$ ) are widely used in comparative genomics and allow the  
95 identification of specific amino acids within a given gene that changed due to positive selection<sup>15-17</sup>  
96 Consequently, several studies performed genome-scale scans for positively selected genes (PSGs) in  
97 African mole-rats and BMR. The first study<sup>18</sup> searched for PSGs on the very long NMR branch in a  
98 four-species<sup>19</sup> comparison with human as an outgroup and the mouse and rat as further rodents.  
99 Among the 142 identified PSG candidates, three were members of a five-protein complex involved in  
100 alternative lengthening of the telomeres. The second study<sup>20</sup>, used ten species with the guinea pig  
101 (*Cavia porcellus*) as most closely related species and scanned for PSGs along the branches leading to  
102 NMR, Damaraland mole-rat (*Fukomys damarensis*) and their last common ancestor (LCA), identifying  
103 334, 179 and 82 candidates, respectively, including candidates associated with neurotransmission of

104 pain in the NMR. A third study<sup>21</sup> used species from all six African mole-rat genera and searched the  
105 branch of the LCA of all African mole-rats that follows divergence from the guinea pig. Signs of  
106 positive selection were identified in 513 genes, including loci associated with tumorigenesis, aging,  
107 morphological development and sociality. All three studies suffer from a methodological limitation  
108 that is common in positive selection studies: in none of these, a closer related species than guinea  
109 pig was included. As guinea pig is not the closest relative of African mole rats not expressing the  
110 phenotypes of interest, it cannot be excluded that fixation of detected signs of positive selection  
111 predates – and therefore could not contribute to – the evolution of these phenotypes<sup>22</sup>. A fourth  
112 study<sup>23</sup> examined the BMR branch using the Chinese hamster (*Cricetulus griseus*) as the most closely  
113 related outgroup. Among the 48 PSG candidates, several were linked to necrosis, inflammation and  
114 cancer.

115 To better resolve the above-mentioned ambiguities and to achieve a higher resolution of positive  
116 selection along rodent phylogenetic branches leading to longevity and eusociality, we analyzed  
117 genomic and transcriptomic data of 17 species – data from public sources and original data  
118 generated for this study. In particular, we generated genomic data for the greater cane rat as a key  
119 species absent from previous analysis and for the silvery mole-rat (SMR, *Heliophobius*  
120 *argenteocinereus*). We systematically scanned 11 evolutionary branches (6 corresponding to extant  
121 species and 5 to ancestral branches). This approach enables us to date precisely the occurrence of  
122 signatures of positive selection with respect to the evolution of the phenotypes of interest on  
123 multiple evolutionary branches of rodents. In addition, we generated RNA-seq data from young and  
124 old NMRs and laboratory rats (*Rattus norvegicus*) to analyze the overlap between PSGs and genes  
125 regulated during aging. Based on this, we discuss the implications of these results on our  
126 understanding of the genetic basis of aging, lifespan and sociality.

127

## 128 **Results and Discussion**

129 As starting points for our analysis, we generated CDS libraries for five rodent species (NMR, AMR,  
130 GMR, SMR and greater cane rat) based on transcriptomic and genomic data. (Table S1/S2). Together  
131 with publicly available rodent CDS catalogs (Table S1), we obtained data for 17 species, including  
132 several additional African mole-rats, the chinchilla, BMR and short-lived outgroups like the guinea  
133 pig, mouse and rat (Fig. 1). From these sequences, we predicted orthologs and best matching  
134 isoforms between the species, calculated alignments and applied multiple times the branch-site test  
135 of positive selection <sup>24</sup>.

136 Based on the lifespans of the extant species, we regarded six extant as well as five ancestral branches  
137 as leading to enhanced longevity and examined them for positive selection (Fig. 1). In total, we  
138 detected 341 PSGs ( $p < 0.05$ , branch-site test). Our PSG assignment is based on nominal p-values, a  
139 common approach in genome-wide scans <sup>21,25,26</sup> since the main error source of such analyses are  
140 alignment errors <sup>27</sup> which result in extremely small p-values and therefore cannot be controlled by  
141 multiple test corrections. Furthermore, simulations have shown that the empirical false positive rate  
142 is very low if an appropriate filtering is used to remove alignment errors and unreliable results <sup>28</sup>.

143 Twenty genes were found on multiple branches (Table S3), resulting in a non-redundant set of  
144 319 PSGs (Table S4-S15). Signs of positive selection for the same gene on multiple branches indicate  
145 possible parallel evolution. Among those, we found *AMHR2* (anti-Mullerian hormone receptor type  
146 2) to be positively selected both on branch 2 (NMR) and branch 11 (BMR). While *AMHR2* plays a role  
147 in male fetal development and in ovarian follicle development of the adult female <sup>29</sup>, no function  
148 with regard to aging is described yet. However, the protein kinase domain of *AMHR2* contains the  
149 greatest number of longevity-selected positions based on a regression analysis with 33 mammalian  
150 species <sup>30</sup>. This domain contains 3 of 8 and 2 of 3 positively selected sites on branch 2 (NMR) and  
151 branch 11 (BMR), respectively.

152

### 153 **Different studies on positive selection in mole-rats show minor overlaps**

154 First, we compared our list of PSGs with the PSGs detected in previous studies of positive selection in  
155 mole-rats<sup>18,20,21,23</sup> (Table S16). As observed before,<sup>21</sup> PSGs from different studies show no or small  
156 overlaps. This is not surprising because the branches examined in previous studies represent  
157 different phylogenetic entities than those used here, even though some of them are named similarly.  
158 For example, Kim et al. examined an “NMR branch” using the house mouse as closest related species  
159<sup>18</sup>. In our study, the sister taxon to NMR is represented by other African mole-rats and the house  
160 mouse is used only as an outgroup (Fig. 1). In a similar way, the analysis of the African mole-rat  
161 ancestor by previous studies<sup>21,23</sup> differs from ours as we incorporated the greater cane rat as closest  
162 related short-lived species and used guinea pig as an outgroup. We therefore analyzed evolutionary  
163 processes on a shorter phylogenetic distance that closely matches the appearance of the phenotypes  
164 under investigation. In addition, there are methodological differences between the studies, e.g.  
165 regarding ortholog prediction or alignment filtering. Unfortunately, the contribution of these  
166 technical variables to the discrepancies cannot be assessed as the alignments used for the previous  
167 studies are not available and cannot be compared with those generated and provided in our study  
168 (Supplement Data).

169

### 170 **Positive selection and age-related regulation are linked**

171 Next, we analyzed the direction of the regulation of PSGs during aging to identify potential links  
172 between positive selection on the analyzed branches and genetic determinants of lifespan. In  
173 general, directionality analysis of gene regulation during aging is complicated by the fact that the  
174 direction itself is not informative, whether the respective gene function is either causing or  
175 counteracting aging. E.g. up-regulation of a causative gene may accelerate aging and shorten lifespan  
176 while adaptive up-regulation to counteract aging phenotypes may extend longevity. We recently  
177 observed that PSGs in short-lived and fast-growing killifish were significantly more often up- than



178 down-regulated during aging<sup>17</sup>. This finding is consistent with the concept of antagonistic pleiotropy  
179<sup>31</sup> suggesting that the same genes that are positively selected in short-lived species for fast growth  
180 and maturation at young age are drivers of aging at old age. The antagonistic pleiotropy hypothesis is  
181 well supported, e.g. by the fact that growth rate and lifespan are negatively correlated, both  
182 between species and within many species<sup>6,32</sup>. If, however, up-regulation of PSGs in short-lived  
183 species may cause aging, we hypothesized that selection for longevity is more compatible with  
184 attenuation of gene activity – either on the level of protein function or gene regulation – since  
185 avoiding damage is easier than improving repair.

186 Following this hypothesis, we performed RNA-seq in liver from old vs. young males of both long-lived  
187 NMRs and short-lived rats (>21 vs. 2-4 years and 24 vs. 6 months, respectively; Table S17-S19).  
188 Indeed, the union of PSGs showed preference for down-regulation in NMR and for up-regulation in  
189 rats in respect to all regulated genes ( $p=0.0089$ , Lancaster procedure<sup>33</sup>). Moreover, the down-  
190 regulation in the long-lived and up-regulation in the short-lived species originate largely from the  
191 same genes as in a combined view on aging related expression changes in NMR and rat (Fig. 2), PSGs  
192 showed a highly significant preference for quadrant I (down in NMR, up in rat;  $p=0.0014$ , one-sided  
193 fisher test, quadrant I against the sum of II, III, IV). These results indicate that identified PSGs are  
194 associated with expression changes during aging of long- and short-lived rodents consistent with the  
195 antagonistic pleiotropy theory of aging.

196 To functionally annotate PSGs in respect to aging, we performed gene ontology (GO) term  
197 enrichment analysis. Regarding all genes, there was a significant enrichment for down-regulation in  
198 126 terms during NMR aging while no term was enriched for up-regulation (Table S20,  $FDR<0.05$ ,  
199 GAGE). The enriched 126 terms were summarized into 16 categories (Tables S21/S22, REVIGO).  
200 Among the six top categories are “translation” (GO:0006412), “cellular respiration” (GO:0045333),  
201 “response to oxidative stress” (GO:0006979) and “iron ion homeostasis” (GO:0055072) previously  
202 linked to aging (see below). With respect to possible pleiotropic effects, translation and cellular  
203 respiration are also key components of the growth program. To evaluate the PSGs in respect to these

204 categories, we built the union of genes for each category and tested for overrepresentation of PSGs.  
205 Regarding all PSGs, there was a significant overlap with “cellular respiration” ( $p=0.0022$ , one-sided  
206 fisher test) and “response to oxidative stress” ( $p=0.029$ ). Regarding only the 82 PSGs that were down-  
207 regulated in NMR and up-regulated during rat aging (quadrant I, Fig. 2), all four categories were  
208 significantly enriched (cellular respiration:  $p=2.1 \times 10^{-6}$ , response to oxidative stress:  $p=0.022$ , iron ion  
209 homeostasis:  $p=8.5 \times 10^{-4}$ , translation:  $p=0.011$ ; Table S23). This again suggests that PSGs are linked to  
210 aging relevant processes in an antagonistic pleiotropic way. The result is also consistent with the  
211 hyperfunction theory of aging that suggests that antagonistic pleiotropy works via a mechanism of  
212 “perverted” growth. According to this theory the growth program that is beneficial during youth is  
213 not entirely stopped after finishing development and causes damage from that point on. The theory  
214 further claims that the master regulator mTOR governs this growth program<sup>34,35</sup>.

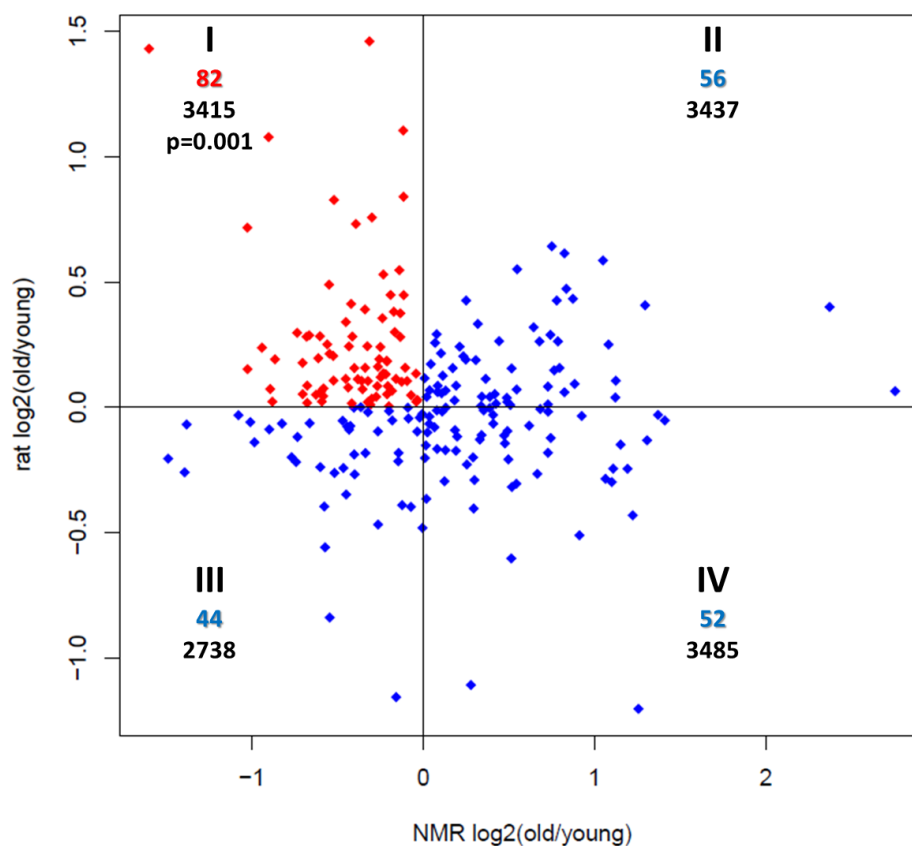

215  
216 **Figure 2.** PSG expression changes during aging of NMR and laboratory rat. The roman numbers  
217 describe the quadrant, the colored numbers below that show the number of PSGs in the respective  
218 quadrant and the black numbers at the bottom give the total regulated genes in the quadrant. The

219 red marked quadrant (I) represents PSGs that were down regulated in the long-lived NMR and up  
220 regulated in the short-lived rat and tested against the sum of three blue marked quadrants (II, III, IV)  
221 with Fisher's exact test (one-sided). The resulting p-value is shown in quadrant I. The total number of  
222 PSGs shown in this plot (234) is lower than the unique number of all PSGs (319) due to missing  
223 expression of genes in NMR and/or rat as well as missing log<sub>2</sub>-fold-changes in at least one of the  
224 species (DEseq2).

225

### 226 **Inflammation and host defense are enriched in branches leading to longevity**

227 Subsequently, we searched for enriched gene ontologies in the union of PSGs across the 11 branches  
228 along which longevity evolved and in each of these branches separately (Table S24). We found  
229 enrichments of genes involved in inflammatory response (GO:0006954; FDR=0.0068, Fisher's exact  
230 test) and defense response (GO:0006952, FDR=0.0092). Aging is tightly associated to the delicate  
231 balance between pro-inflammatory responses to resist potentially fatal infections and the inexorable  
232 damages that are accumulated by this<sup>36,37</sup>. Chronic inflammation is described as a major risk factor  
233 for aging and aging-related diseases such as atherosclerosis, diabetes, Alzheimer's disease,  
234 sarcopenia and cancer<sup>38</sup>.

235

### 236 **mTOR, autophagy and translation pathways show signs of positive selection leading to longevity**

237 On branch 2 (NMR), we found *RHEB* (Ras homolog enriched in brain) coding for a direct regulator of  
238 mTOR (mechanistic target of rapamycin) and on branch 9 (AMR) its paralog *RHEBL1* to be positively  
239 selected, a situation consistent with the concepts of parallel evolution as well as of  
240 subfunctionalization of genes after duplication. mTOR operates as a central regulator of cell  
241 metabolism, growth, inflammation and proliferation and was identified as a key regulator of aging  
242 and aging-related diseases in yeast, nematodes, fruit flies, and mice<sup>39,40</sup>.

243 mTOR is also a key regulator of autophagy<sup>41</sup>. Autophagy is a cellular protective cleaning mechanism,  
244 required for organelle homeostasis, especially mitochondria. While enhanced autophagy was shown  
245 to be associated with lifespan extension in worms, flies and mice, inhibition of autophagy,  
246 conversely, leads to premature aging in mice<sup>42</sup>. An essential autophagy gene, *LAMP2* (lysosomal  
247 associated membrane protein 2), was identified as PSG on branch 2 (NMR) and branch 11 (BMR). As  
248 a receptor for chaperone-mediated autophagy and a major protein component of the lysosomal  
249 membrane, *LAMP2* is required for degradation of individual proteins through direct import into the  
250 lysosomal lumen<sup>43,44</sup>. Aging-dependent decrease of *LAMP2* expression was observed in mouse liver.  
251 Reinstatement of juvenile *LAMP2* levels in aged mice significantly reduces aging-dependent decline  
252 of cell function and restores the degree of cell damage to that found in young mice<sup>45</sup>.

253 Besides the lysosome, another cellular protein quality control and degradation system is the  
254 proteasome. While impaired proteasome function and subsequent accumulation of misfolded  
255 proteins were tightly correlated with aging and aging-related neurodegenerative disorders like  
256 Parkinson's and Alzheimer's disease, long-lived humans have sustained proteasome activity<sup>46-48</sup>. Two  
257 proteasome subunit genes, *PSMG1* (proteasome assembly chaperone 1) and *PSMB4* (proteasome  
258 subunit beta 4), were identified as PSGs on branch 11 (BMR). *PSMB4* has been classified as a driver  
259 for several types of tumors<sup>49</sup> and is a known interaction partner of PRP19 (pre-mRNA-processing  
260 factor 19 or senescence evasion factor) that is essential for cell survival and DNA repair<sup>50</sup>.

261 Another aging relevant downstream process regulated by mTOR is translation. We identified two  
262 ribosomal proteins, *RPL7L1* and *RPL27A*, on branch 3 (LCA of all African mole-rats except NMR).  
263 While in general, cytosolic ribosomal proteins are up-regulated with aging in humans<sup>51</sup>, rats<sup>52</sup> and  
264 killifish<sup>53</sup> both genes are significantly down-regulated during NMR aging (FDR≤0.05, DESeq2). This fits  
265 the down-regulation of translation-related processes during NMR aging in general (see above).  
266 Furthermore, the protein synthesis machinery is a driver of replicative senescence in yeast<sup>54</sup>. The  
267 longitudinal aging study in killifish<sup>55</sup> highlighted the starting values at 10 weeks and the amplitude of  
268 age-dependent increase of ribosomal proteins to be negatively correlated with lifespan. Inhibition of

269 protein synthesis by reduction of ribosomal proteins was shown to extend lifespan in worms<sup>56</sup> and  
270 mice<sup>57</sup>.

271

272 **Positive selection leading to longevity affects mitochondrial biogenesis and regulation of oxidative**  
273 **stress**

274 Besides regulation of cytoplasmic translation of nuclear encoded genes, mTOR is also involved in  
275 mitochondrial translation. There appears to be a complex interplay between mTOR signaling,  
276 mitochondrial gene expression and oxygen consumption as well as production of reactive oxygen  
277 species (ROS)<sup>58-60</sup>. Across multiple longevity-associated branches we identified PSGs that are  
278 involved in mitochondrial biogenesis (Table 1). We found, e.g., an enrichment of "mitochondrial  
279 translation" (GO:0032543, FDR=0.044) on branch 5 (SMR), the mitochondrial transcriptional  
280 termination factor (MTERF) on branch 2 (NMR) and six mitochondrial ribosomal proteins (MRPs)  
281 distributed on branches 5 (SMR), 7 (LCA of AMR and GMR) and 11 (BMR). Furthermore, nuclear  
282 encoded genes of respiratory chain complex I (*NDUFA9* and *NDUFB11*: NADH ubiquinone  
283 oxidoreductase subunits A9 and B11) and complex IV (*COX14*: cytochrome c oxidase assembly factor  
284 COX14) were identified as PSGs. Of note, we found 6 of these 15 genes to be significantly down-  
285 regulated during aging in NMR (Table 1). This suggests a functional relation of these genes to the  
286 aging process in an extremely long-lived rodent and is concordant with the down-regulation of genes  
287 involved in cellular respiration during NMR aging described above.

288

289 **Table 1.** Mitochondrial biogenesis genes under positive selection on longevity-associated branches.

| Gene           | Positively selected on branch |                          | NMR aging | Function in mitochondrium |
|----------------|-------------------------------|--------------------------|-----------|---------------------------|
|                | Branch number                 | Branch description       |           |                           |
| <i>NDUFA9</i>  | 8                             | GMR                      | ↓         | Complex I                 |
| <i>MTERF</i>   | 2                             | NMR                      | ns        | Transcription             |
| <i>SDHAF2</i>  | 2                             | NMR                      | ns        | Complex I                 |
| <i>UQCRC2</i>  | 2                             | NMR                      | ↓         | Complex III               |
|                | 3                             | LCA after NMR divergence |           |                           |
| <i>NDUFB11</i> | 5                             | SMR                      | ↓         | Complex I                 |
| <i>MRPS11</i>  | 5                             | SMR                      | ↓         | Translation               |
| <i>MRPS36</i>  | 5                             | SMR                      | ↓         | Translation               |
| <i>MRPL30</i>  | 5                             | SMR                      | ↓         | Translation               |
| <i>TRNT1</i>   | 11                            | BMR                      | ns        | RNA processing            |
| <i>COX14</i>   | 11                            | BMR                      | ns        | Complex IV                |
| <i>DARS2</i>   | 11                            | BMR                      | ns        | RNA processing            |
| <i>MRPL57</i>  | 11                            | BMR                      | ns        | Translation               |
| <i>MRPL15</i>  | 11                            | BMR                      | ns        | Translation               |
| <i>MRPL28</i>  | 7                             | Fukomys LCA              | ns        | Translation               |
| <i>GATC</i>    | 10                            | long-tailed chinchilla   | ns        | RNA processing            |

290 Note: Branch numbers refer to figure 1. LCA – last common ancestor; ↓ – significantly lower  
 291 expressed in liver of old animals compared to young animals (FDR<0.05); ns – not significantly  
 292 changed.  
 293

294 Studies in mouse and the short-lived killifish have shown that expression of MRPs and complex I  
 295 genes is negatively correlated with individual lifespan<sup>55,61</sup>. Knock-down of MRPs in worms results in  
 296 an impaired assembly of respiratory complexes and life-extension<sup>62</sup>. Furthermore, we recently  
 297 identified a significant enrichment of mitochondrial biogenesis genes including those for multiple  
 298 MRPs, complex I components and MTERF among PSGs on two ancestral branches of annual killifishes  
 299 on which lifespan was shortened considerably and independently from each other<sup>17</sup>. Altogether,  
 300 these results raise again the intriguing possibility that similar or even the same genes could be  
 301 causally linked to the evolution of both short and long lifespan.

302 Mitochondria are also the main source of ROS that cause oxidative stress, i.e. damages to DNA,  
 303 proteins and other cellular components<sup>63</sup>. Oxidative stress is thought to play a major role in the  
 304 pathogenesis of neurodegenerative diseases<sup>64</sup> and even the determination of lifespan in general  
 305 (“oxidative stress theory of aging”)<sup>65</sup>. On branch 3 (LCA of all African mole-rats except NMR), we

306 found an enrichment of oxidoreductase activity (GO: GO:0016491; FDR=0.024) and positive selection  
307 of *TXN* (thioredoxin), coding for an oxidoreductase enzyme that acts as an antioxidant extending  
308 lifespan in fly<sup>66</sup> and potentially also in mice<sup>67,68</sup>. As an example of continued evolution, *TXN* was  
309 found to be positively selected also on branch 7 (LCA of AMR and GMR). *SOD2* (superoxide dismutase  
310 2) and *CCS* (copper chaperone for superoxide dismutase) are PSGs on branch 10 (chinchilla) and  
311 branch 2 (NMR), respectively. Both genes are involved in ROS defense and affect aging/lifespan in  
312 several species<sup>69,70</sup>. This is interesting because in recent years, it has been repeatedly questioned  
313 that the oxidative stress theory of aging has much relevance for bathyergid rodents, given that  
314 several studies failed to find improved antioxidant capacities and/or less accumulation of oxidative  
315 damage in NMRs compared to the much shorter-lived mice<sup>71-73</sup>. This is consistent with our finding of  
316 down-regulation of processes involved in “response to oxidative stress” (GO:0006979) during aging in  
317 NMR (see above). On the other hand, significantly higher levels of oxidative damage on proteins and  
318 lipids in non-reproductive as compared to reproductive females of the Damaraland mole-rat were  
319 found<sup>74</sup>. Since non-reproductive individuals live shorter (and hence age faster) than their  
320 reproductive counterparts in *Fukomys* sp.<sup>75-77</sup>, these results are consistent with the oxidative stress  
321 theory of aging. The diverse signs of positive selection on branch 2 (NMR), 3 (LCA of all African mole-  
322 rats except NMR) and 7 (LCA of AMR and GMR) may suggest that the impact of oxidative stress on  
323 aging differs between NMR and other African mole-rats.

324 ROS production and ROS-induced damage to biomolecules are intertwined with the formation of  
325 advanced glycation end-products (AGEs). AGEs are stable bonds between carbohydrates and  
326 proteins/lipids which are formed in a non-enzymatic fashion. AGEs activate membrane-bound or  
327 soluble AGER (AGE specific receptor) and AGEs/AGER have been linked to several aging-related  
328 diseases including Alzheimer’s disease and diabetes<sup>78</sup>. Interestingly, *AGER* was found to be a PSG on  
329 branch 9 (AMR) and branch 10 (chinchilla). The role of AGEs/AGER in aging is complex and Janus-  
330 faced<sup>79</sup>. *AGER* is significantly up-regulated in liver during NMR aging. Similarly, in skin AGE levels rise

331 with chronological age in AMR, but surprisingly are higher in the skin of slow aging breeders than of  
332 faster aging non-breeders<sup>80</sup>

333

#### 334 **Additional links between positive selection and longevity**

335 The gene *APOA1* (apolipoprotein A1) was found as PSG on branch 7 (LCA of AMR and GMR) and  
336 significantly up-regulated during NMR aging in liver. APOA1 is a component of HDL-particles which  
337 are as transporter of cholesterol relevant for aging-associated diseases. Polymorphisms of APOA1 are  
338 associated to coronary artery disease<sup>81</sup>. Furthermore, APOA1 is an interaction partner of APOE a  
339 well-described genetic risk factor for Alzheimer's and cardiovascular diseases<sup>82</sup> and the locus with  
340 the largest statistical support for an association with extreme longevity<sup>83</sup>. Same as *MTERF* (see  
341 above), *APOA1* is one of nine genes that we recently found to be positively selected on both of two  
342 ancestral sister branches of annual fishes on which lifespan was independently reduced<sup>17</sup>.

343 *TF* (transferrin) was identified as PSG on branch 4 (LCA of Cape, Cape dune, giant, AMR and common  
344 mole-rats). TF is an iron-binding protein responsible for transport of iron in the bloodstream and  
345 therefore essential for iron homeostasis<sup>84</sup>. Neurons regulate iron intake via the TF receptor and  
346 dysregulation of this tightly controlled process in the brain is associated with neurodegenerative,  
347 age-related diseases like Parkinson's and Alzheimer's<sup>85</sup>. TF is significantly down-regulated during  
348 NMR aging which is consistent with the down-regulation of "iron ion homeostasis" (GO:0055072)  
349 related processes during NMR aging in general (see above).

350

#### 351 **Selection signatures of social evolution among African mole rats is consistent with a scenario of** 352 **ancestral eusociality**

353 Although all African mole-rats are strictly subterranean and occupy similar nutritional niches, intra-  
354 familiar variety of social and mating systems is amazingly high. Solitariness and polygamy in some



355 genera (*Heliophobius*, *Georychus* and *Bathyergus*) contrast sharply with social organization in others  
356 (*Heterocephalus*, *Fukomys* and *Cryptomys*). In the latter, stable monogamous bonding of (typically  
357 one) reproductive founder pair coupled with prolonged philopatry and reproductive altruism of their  
358 offspring result in extended and cooperatively breeding family units, which can grow to considerable  
359 size. There has been much debate whether eusociality in African mole-rats is a derived or ancestral  
360 trait<sup>86,87</sup>. The first scenario assumes a solitary LCA of African mole-rats (branch 1) and subsequent  
361 independent, parallel evolution of eusocial habits on branch 2 (NMR) and branch 6 (LCA of AMR,  
362 GMR and common mole-rats) and/or branch 7 (LCA of AMR and GMR)<sup>21</sup>. In contrast, the second  
363 scenario suggests a eusocial LCA of all mole-rats (branch 1) and independent loss of this phenotype in  
364 the SMR (branch 5) and the LCA of the genera *Bathyergus* and *Georychus* (Cape and Cape dune mole-  
365 rat). Recent phylogenetic approaches are more supportive of scenario 2<sup>88,89</sup> however, a PSG-based  
366 analysis of the issue is still lacking. Accordingly, we searched our data in support of one or the other  
367 scenario.

368 All four PSGs found on the ancestral branch 1 of all African mole-rats are involved in signaling,  
369 resulting in enrichments, e.g., of "positive regulation of cell communication" (GO:0010647,  
370 FDR=0.0092) and "positive regulation of signaling" (GO:0023056, FDR=0.0092). Enrichments in signal  
371 transduction were identified as major common pattern of the multiple independent occurrences of  
372 eusociality in bees<sup>90</sup> strongly suggesting parallel evolution in eusocial insects and mammals.

373 On the other hand, members of the major histocompatibility complex (MHC) were identified as PSG  
374 on branch 2 (NMR) and on branch 7 (LCA of AMR and GMR). MHC genes have a central function in  
375 the acquired immune system and immune dysfunction is involved in many neurodevelopmental  
376 disorders as well as social behavior deficits in mice and humans<sup>91,92</sup>. MHCs have been implicated in  
377 language impairment and schizophrenia<sup>93,94</sup>. A human allele of *HLA-A* was associated with autism  
378 defined as a pattern of behavior identified by deficits in communication and reciprocal social  
379 interactions<sup>95</sup>.

380 Additionally, we found two signals with a potential link to social evolution on branch 2 (NMR), but  
381 not branch 6 (LCA of AMR, GMR and common mole-rats) or 7 (LCA of AMR and GMR). The first were  
382 innate immune system related enrichments "positive regulation of T cell activation" (GO:0050870,  
383 FDR=0.027) and "positive regulation of leukocyte cell-cell adhesion" (GO:1903039, FDR=0.027). In  
384 social ants and bees, it was shown that several innate immune genes have a pattern of accelerated  
385 amino acid evolution compared both to non-immunity genes in the same species and immune genes  
386 in solitary fly<sup>96</sup>. Second, we found *NOTCH2* positively selected only on branch 2 (NMR). The encoded  
387 protein is one of four Notch-receptors. Notch signaling regulates interactions between physically  
388 adjacent cells and has a central role in the development of many tissues, including neurons<sup>97</sup>. It was  
389 demonstrated that Notch signaling represses reproduction in worker honeybees depending on the  
390 presence of the queen and that chemical inhibition of Notch signaling can overcome the repressive  
391 effect of queen pheromone in regard to the worker ovary activity<sup>98</sup>.

392 On the other hand, *HSD11B1* (hydroxysteroid 11-beta dehydrogenase 1) was identified as PSG on  
393 branch 6 (LCA of AMR, GMR and common mole-rats), but not branch 2 (NMR). The encoded protein  
394 catalyzes reversibly the conversion of the stress hormone cortisol to the inactive metabolite  
395 cortisone<sup>99</sup>. Cortisol concentration was shown to inversely correlate with social ranks in NMRs<sup>100</sup>  
396 and with anti-social and isolation behavior in human adolescents<sup>101,102</sup>. Furthermore, cortisol  
397 regulates carbohydrate metabolism that is another common enriched GO-Term in the evolution of  
398 eusociality in bees<sup>90</sup>. Not linked to eusociality but still noteworthy, *HSD11B1* is significantly down-  
399 regulated during aging in the NMR and knockout of *HSD11B1* in mice improves their cognitive  
400 performance in aging<sup>103</sup>. Furthermore, inhibition was described as a risk factor for cardiovascular  
401 disease and diabetes type 2<sup>104</sup>.

402 Taken together, our data are in best agreement with a scenario assuming eusociality (or a  
403 predisposition for it) in the LCA of all African mole-rats, followed by further independent, branch-  
404 specific evolution or loss of the phenotype leading to the distinct social genera that live today.

405

406 **Homology modeling suggests functional consequences of amino acid changes under positive**  
407 **selection**

408 To evaluate the structural impact of positively selected amino acid changes, we performed homology  
409 modeling using exemplary the sites of highest probability for selection in cytoplasmic thioredoxin  
410 (TXN) and transferrin (TF). As mentioned above *TXN* is positively selected on branch 7 (LCA of AMR  
411 and GMR). In TXN of these species, there is a tyrosine residue that replaces Cys69. The latter,  
412 together with Cys62 and Cys73, constitute highly conserved mammalian non-catalytic cysteines. The  
413 local structure around Cys69 and Cys62 in TXN is important for interaction with the cytoplasmic  
414 thioredoxin reductase (TR1; <sup>105</sup>), which ‘recycles’, i.e. re-reduces, the catalytic cysteines of oxidized  
415 TXN. The modeling using the structure of a fully reduced human TXN (1ERT; <sup>106</sup>) as template suggests  
416 that the rather bulky side chain of Tyr69 can be accommodated in the structure of TXN (Fig. 3A),  
417 hence allowing for a productive helical interface region to TR1. TXN recycling is inhibited by  
418 formation of a disulfide bridge between Cys62 and Cys69 (Fig S1; see <sup>107</sup>), e.g. under highly oxidative  
419 conditions, thereby diminishing the pool of catalytically active TXN under oxidative stress <sup>108,109</sup>.  
420 Obviously, that disulfide bridge cannot form in AMR and GMR because of Cys69Tyr. From this, we  
421 conclude that Tyr69 is compatible with TXN recycling also under oxidative stress. Moreover, Cys69 is  
422 known to be a target for posttranslational modifications with impact on e.g. anti-apoptotic/apoptotic  
423 signaling pathways (for a review see: <sup>110</sup>), raising interesting questions on physiological consequences  
424 of the Cys69Tyr replacement.

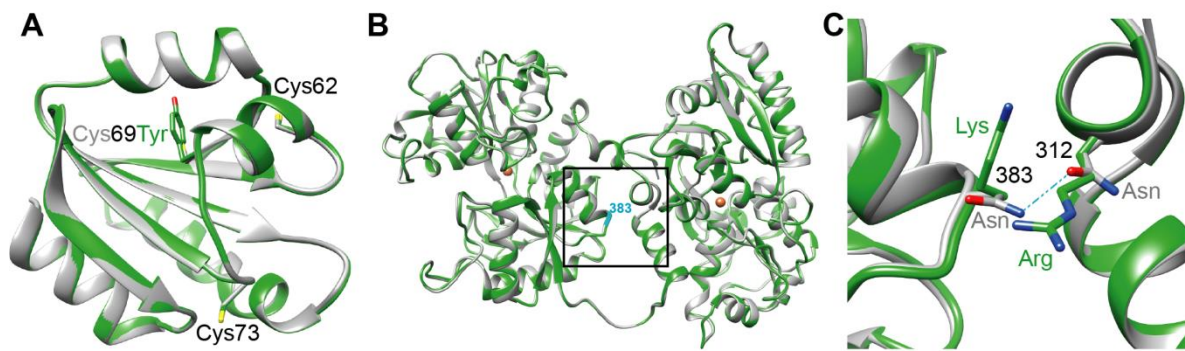

425  
426 **Figure 3.** Homology models of Ansell's mole-rat (AMR) thioredoxin (TXN) and transferrin (TF). (A)  
427 Overview of the modeled AMR TXN structure (green) superimposed onto the fully reduced human  
428 TXN template structure (1ERT, grey). Residues discussed in the text are labeled, numbering according  
429 to position in the human sequence. Color code of Cys69 and Tyr69 corresponds to the respective  
430 ribbon representation. Heteroatoms: sulfur in yellow, oxygen in red. (B) Overview of the modeled  
431 AMR TF structure (green) superimposed onto the rabbit TF template structure (1JNF, grey). The  
432 position of the Asn383Lys site discussed in the text at the boxed center of the lobe interface  
433 numbered and indicated in cyan. Brown spheres: Fe<sup>3+</sup> coordinated in the template structure (1JNF,  
434 ion radius enlarged for better visibility). (C) Detail of the TF lobe interface. Shown is a magnification  
435 of the boxed region in (B). Coloring and numbering as in (B), side chain nitrogen atoms (blue), oxygen  
436 atoms (red). Potential hydrogen bond in 1JNF (light blue) as discussed in the text. Numbering (black)  
437 according to positions in the rabbit TF structure (1JNF).

438 TF is a PSG on branch 4 (LCA of Cape, Cape dune, giant, AMR and common mole-rats) and Ser383Lys  
439 is the site of highest probability for selection. Serum TFs form a bilobal structure, and each lobe  
440 contains two dissimilar domains with a single iron-binding site. Inspecting the structure of the AMR  
441 TF modeled on the rabbit protein (1JNF; <sup>111</sup>) as template, we realized that Lys 383 is located at the  
442 interface between the two lobes (Fig. 3B). In the rabbit TF two juxtapositioned Asn residues at  
443 position 383 and 312 might form an H-bond and this constellation could stabilize the inter-lobe  
444 interactions (Fig. 3C). In contrast, the juxtaposition of the positively charged side chains of Lys383  
445 and a conserved Arg312 in the AMR structural model (Fig. 3C) would be expected to weaken the

446 lobe-lobe interaction due to electrostatic repulsion. The functional consequences for TF or TXN  
447 implied by this modeling require experimental validation.

## 448 **Conclusions**

449 We provided a systematic scan for PSGs on evolutionary branches of the African mole-rat family and  
450 other rodents leading to longevity and eusociality. Due to the incorporation of species from all six  
451 genera of the African mole-rats as well as its closest relative, the cane rat, into the analysis, we were  
452 able to examine considerably more extant and ancestral branches than previous studies. This  
453 enabled the analysis to provide a high resolution of positive selection on branches on which the  
454 mentioned traits had evolved.

455 Analyzing the gene expression of PSGs, we found a highly significant pattern of down-regulation in  
456 the long-lived NMR and up-regulation in the short-lived rat, fitting the antagonistic pleiotropy theory  
457 of aging<sup>112</sup> and the hyperfunction theory of aging. The latter claims mTOR as a central hub affecting  
458 aging and lifespan<sup>35</sup>. Correspondingly, the PSGs and enriched functional terms cover many of the  
459 processes that are regulated by the mTOR pathway, e.g. translation, autophagy and mitochondrial  
460 biogenesis. Furthermore, with *RHEB* and its ortholog *RHEB1L* direct regulators of mTOR<sup>113</sup> are under  
461 positive selection in two of the branches. In addition, we linked positive selection with immune  
462 system and the antioxidant defense, processes known to be involved in regulation of lifespan.

463 With regard to evolution of eusociality, our findings are in line with the theory that the LCA of all  
464 African mole-rats had at least a predisposition for social lifestyle that was lost in some lineages, while  
465 in other lineages the ancestral phenotype has further evolved, leading to the distinct social  
466 phenotypes in the extant species.

467 Moreover, we exemplarily showed potential functional relevance of the positively selected sites by  
468 homology modeling on the protein level. This may encourage experimental follow-up studies since all

469 sequences and alignments including the identified positively selected sites are accessible via  
470 supplement data.

## 471 **Methods**

### 472 **CDS data**

473 We examined nine African mole-rat species covering all six genera. Additionally, our analysis  
474 comprises eight outgroup species, including the long-lived BMR and the chinchilla. mRNA sequences  
475 of seven distantly related outgroup species were obtained from RefSeq along with their CDS  
476 annotation (Table S1). For the NMR we used a recently published *de novo* transcriptome assembly  
477 <sup>114</sup>. RNA-seq data for six mole-rat species was obtained from GenBank Sequence Read Archive, study  
478 SRP061925 <sup>21</sup>. The reads were assembled and annotated using FRAMA as described in <sup>114</sup>.

479 For AMR and GMR, purification of RNA from 13 and 17 tissues, respectively, was done using Qiagen  
480 RNeasy Mini Kit following the manufacturer's description. Novel RNA-seq was performed for both  
481 species as described in Table S2. *De novo* transcriptome assemblies of the generated data were  
482 performed using FRAMA <sup>114</sup> (see Table S1).

483 For the SMR and the greater cane rat genome sequencing was performed to complement the  
484 transcriptome data. DNA was isolated from liver tissue of two female SMR individuals and a male  
485 liver of the greater cane rat using DNeasy Blood & Tissue (Qiagen). DNA was then converted to  
486 Illumina libraries and sequencing was done as given in Table S2. Sequence reads were cleaned by  
487 removal of adaptors and low-quality regions at the ends (i.e. regions with more than 10% with  
488 quality score  $\leq 20$ ). Low quality reads (i.e. less than 50% remained) and duplicons were discarded. *De*  
489 *novo* genome sequence assembly was performed using CLC assembler (CLC Genomics) with default  
490 settings. The CDS annotation was done using AUGUSTUS <sup>115</sup> with AMR CDSs as hint.

491 All animals were housed and euthanized compliant with national and state regulations. Read data  
492 was deposited as ENA (European Nucleotide Archive) study PRJEB20584.

493

#### 494 **Identification of positively selected genes**

495 To scan on a genome-wide scale for genes under positive selection, we fed the CDSs of the described  
496 species set along with the branches we wanted to examine (Fig. 1) into the PosiGene pipeline<sup>28</sup>.  
497 GMR was used as PosiGene's anchor species. Regarding the SMR, for which we had both a genome  
498 and a transcriptome assembly, we used generally the transcriptome assembly, except for those  
499 ortholog groups in which no SMR ortholog could be assigned via transcriptomic but via genomic data.  
500 This was accomplished by calling the three PosiGene modules separately, feeding both assemblies  
501 independently in the first module (ortholog assignment) and deleting all genome-based SMR  
502 sequence in those ortholog groups that contained transcriptome-based SMR CDSs before calling the  
503 second module. An overview about the number of genes and sequences tested for positive selection  
504 in the different branches is shown in Table S1. We considered all genes with nominal p-values  $\leq 0.05$   
505 as PSGs.

506

#### 507 **Gene ontologies**

508 We determined enrichments for GO categories with Fisher's exact test based on on the R package  
509 GOstats. The resulting p-values were corrected using the Benjamini-Hochberg method (FDR).

510

#### 511 **Differentially expressed genes during NMR and rat aging**

512 The young and old rats (strain Wistar) had an age of 6 (n=4) and 24 (n=5) months, respectively. The  
513 young NMRs had an age of  $3.42 \pm 0.58$  years (average $\pm$ sd, n=6). The old NMRs were at least 21 years

514 old (recorded lifetime in captivity, n=3). All examined animals were males. All animals were housed  
515 and euthanized compliant with national and state regulations. For both species, purification of RNA  
516 from liver samples was done using Qiagen RNeasy Mini Kit following the manufacturer's description.  
517 In short, we performed RNA-seq using Illumina HiSeq 2500 with 50 nt single read technology and a  
518 sequencing depth of at least 20 mio reads/sample (Table S17). For NMR, the read mapping was  
519 performed with STAR <sup>116</sup> (--outFilterMismatchNoverLmax 0.06 --outFilterMatchNminOverLread 0.9 --  
520 outFilterMultimapNmax 1) against the public genome (Bioproject: PRJNA72441) that we had  
521 annotated before by aligning the above mentioned NMR transcriptome reference using BLAT <sup>117</sup> and  
522 SPLIGN <sup>118</sup>. Rat reads were aligned against the mentioned RefSeq reference using bwa aln <sup>119</sup> (-n 2 -o  
523 0 -e 0 -O 1000 -E 1000). Read data and counts were deposited as GEO (Gene Expression Omnibus)  
524 series GSE98746. Differentially expressed genes (FDR≤0.05, Table S18, S19) and fold-changes were  
525 determined with DESeq2 <sup>120</sup>. GAGE <sup>121</sup> was used to determine enriched gene ontologies based on  
526 fold-changes (Table S20). Gene ontologies with FDR≤0.05 were summarized using REVIGO (allowed  
527 similarity=0.5) <sup>122</sup>. Four of the six largest summarized categories of the resulting treemap (Table  
528 S21/S22) were further analyzed due their aging relevance (representative terms given): “translation”  
529 (GO:0006412), “cellular respiration” (GO:0045333), “response to oxidative stress” (GO:0006979) and  
530 “iron ion homeostasis” (GO:0055072). For each of these categories the union of genes across gene  
531 ontology terms was built. These unions were tested for significant overlaps with (i) the union of PSGs  
532 across branches and (ii) the union of PSGs across branches that were down-regulated during aging in  
533 NMR and up-regulated in rat (Fisher's exact test). Functional annotation of the PSGs in respect to the  
534 four categories is given in Table S23).

535

### 536 **Homology modeling of protein structure**

537 Models were built in SWISS-MODEL (<http://swissmodel.expasy.org>;) <sup>123,124</sup>. No further optimization  
538 was applied to the resulting TXN and TF models. Superimposition of the model and template  
539 structures and rendering was carried out using CHIMERA <sup>125</sup>.



540

## 541 **Data availability**

542 Read data for AMR, GMR, SMR and greater cane rat was deposited as ENA (European Nucleotide  
543 Archive) study PRJEB20584. Read data for NMR and rat was deposited as GEO (Gene Expression  
544 Omnibus) series GSE98746.

## 545 **References**

- 546 1 Austad, S. N. Comparative biology of aging. *J Gerontol A Biol Sci Med Sci* **64**, 199-201,  
547 doi:10.1093/gerona/gln060 (2009).
- 548 2 Austad, S. N. Diverse aging rates in metazoans: targets for functional genomics. *Mech Ageing*  
549 *Dev* **126**, 43-49, doi:10.1016/j.mad.2004.09.022 (2005).
- 550 3 de Magalhaes, J. P., Costa, J. & Church, G. M. An analysis of the relationship between  
551 metabolism, developmental schedules, and longevity using phylogenetic independent  
552 contrasts. *J Gerontol A Biol Sci Med Sci* **62**, 149-160 (2007).
- 553 4 Fan, R., Olbricht, G., Baker, X. & Hou, C. Birth mass is the key to understanding the negative  
554 correlation between lifespan and body size in dogs. *Aging (Albany NY)* **8**, 3209-3222,  
555 doi:10.18632/aging.101081 (2016).
- 556 5 Tacutu, R. *et al.* Human Ageing Genomic Resources: integrated databases and tools for the  
557 biology and genetics of ageing. *Nucleic Acids Res* **41**, D1027-1033 (2013).
- 558 6 Fushan, A. A. *et al.* Gene expression defines natural changes in mammalian lifespan. *Aging*  
559 *Cell* **14**, 352-365, doi:10.1111/accel.12283 (2015).
- 560 7 Van Daele, P. A., Verheyen, E., Brunain, M. & Adriaens, D. Cytochrome b sequence analysis  
561 reveals differential molecular evolution in African mole-rats of the chromosomally  
562 hyperdiverse genus *Fukomys* (Bathyergidae, Rodentia) from the Zambezan region. *Mol*  
563 *Phylogenet Evol* **45**, 142-157, doi:10.1016/j.ympev.2007.04.008 (2007).
- 564 8 Gorbunova, V., Seluanov, A., Zhang, Z., Gladyshev, V. N. & Vijg, J. Comparative genetics of  
565 longevity and cancer: insights from long-lived rodents. *Nat Rev Genet* **15**, 531-540,  
566 doi:10.1038/nrg3728 (2014).
- 567 9 Jarvis, J. U. Eusociality in a mammal: cooperative breeding in naked mole-rat colonies.  
568 *Science* **212**, 571-573 (1981).
- 569 10 Buffenstein, R. Negligible senescence in the longest living rodent, the naked mole-rat:  
570 insights from a successfully aging species. *J Comp Physiol B* **178**, 439-445,  
571 doi:10.1007/s00360-007-0237-5 (2008).
- 572 11 Delaney, M. A. *et al.* Initial Case Reports of Cancer in Naked Mole-rats (*Heterocephalus*  
573 *glaber*). *Vet Pathol* **53**, 691-696, doi:10.1177/0300985816630796 (2016).
- 574 12 Taylor, K. R., Milone, N. A. & Rodriguez, C. E. Four Cases of Spontaneous Neoplasia in the  
575 Naked Mole-Rat (*Heterocephalus glaber*), A Putative Cancer-Resistant Species. *J Gerontol A*  
576 *Biol Sci Med Sci* **72**, 38-43, doi:10.1093/gerona/glw047 (2017).
- 577 13 Seluanov, A. *et al.* Hypersensitivity to contact inhibition provides a clue to cancer resistance  
578 of naked mole-rat. *Proc Natl Acad Sci U S A* **106**, 19352-19357,  
579 doi:10.1073/pnas.0905252106 (2009).
- 580 14 Gorbunova, V. *et al.* Cancer resistance in the blind mole rat is mediated by concerted  
581 necrotic cell death mechanism. *Proc Natl Acad Sci U S A* **109**, 19392-19396,  
582 doi:10.1073/pnas.1217211109 (2012).

- 583 15 Kosiol, C. *et al.* Patterns of positive selection in six Mammalian genomes. *PLoS Genet* **4**,  
584 e1000144 (2008).
- 585 16 Roux, J. *et al.* Patterns of positive selection in seven ant genomes. *Mol Biol Evol* **31**, 1661-  
586 1685 (2014).
- 587 17 Sahm, A., Bens, M., Platzer, M. & Cellerino, A. Parallel evolution of genes controlling  
588 mitonuclear balance in short-lived annual fishes. *Aging Cell*, doi:10.1111/ace1.12577 (2017).
- 589 18 Kim, E. B. *et al.* Genome sequencing reveals insights into physiology and longevity of the  
590 naked mole rat. *Nature* **479**, 223-227 (2011).
- 591 19 Chandrasekaran, A., Idelchik, M. D. & Melendez, J. A. Redox control of senescence and age-  
592 related disease. *Redox Biol* **11**, 91-102, doi:10.1016/j.redox.2016.11.005 (2017).
- 593 20 Fang, X. *et al.* Genome-wide adaptive complexes to underground stresses in blind mole rats  
594 Spalax. *Nat Commun* **5**, 3966 (2014).
- 595 21 Davies, K. T., Bennett, N. C., Tsagkogeorga, G., Rossiter, S. J. & Faulkes, C. G. Family Wide  
596 Molecular Adaptations to Underground Life in African Mole-Rats Revealed by Phylogenomic  
597 Analysis. *Mol Biol Evol* **32**, 3089-3107 (2015).
- 598 22 Sahm, A., Platzer, M. & Cellerino, A. Outgroups and Positive Selection: The *Nothobranchius*  
599 *furzeri* Case. *Trends Genet* **32**, 523-525 (2016).
- 600 23 Fang, X. *et al.* Adaptations to a subterranean environment and longevity revealed by the  
601 analysis of mole rat genomes. *Cell Rep* **8**, 1354-1364 (2014).
- 602 24 Zhang, J., Nielsen, R. & Yang, Z. Evaluation of an improved branch-site likelihood method for  
603 detecting positive selection at the molecular level. *Mol Biol Evol* **22**, 2472-2479 (2005).
- 604 25 Bakewell, M. A., Shi, P. & Zhang, J. More genes underwent positive selection in chimpanzee  
605 evolution than in human evolution. *Proc Natl Acad Sci U S A* **104**, 7489-7494 (2007).
- 606 26 Gaya-Vidal, M. & Alba, M. M. Uncovering adaptive evolution in the human lineage. *BMC*  
607 *Genomics* **15**, 599 (2014).
- 608 27 Fletcher, W. & Yang, Z. The effect of insertions, deletions, and alignment errors on the  
609 branch-site test of positive selection. *Mol Biol Evol* **27**, 2257-2267 (2010).
- 610 28 Sahm, A., Bens, M., Platzer, M. & Szafranski, K. PosiGene: automated and easy-to-use  
611 pipeline for genome-wide detection of positively selected genes. *Nucleic Acids Res*,  
612 doi:10.1093/nar/gkx179 (2017).
- 613 29 Durlinger, A. L., Visser, J. A. & Themmen, A. P. Regulation of ovarian function: the role of anti-  
614 Mullerian hormone. *Reproduction* **124**, 601-609 (2002).
- 615 30 Semeiks, J. & Grishin, N. V. A method to find longevity-selected positions in the mammalian  
616 proteome. *PLoS One* **7**, e38595, doi:10.1371/journal.pone.0038595 (2012).
- 617 31 Hughes, K. A. & Reynolds, R. M. Evolutionary and mechanistic theories of aging. *Annu Rev*  
618 *Entomol* **50**, 421-445, doi:10.1146/annurev.ento.50.071803.130409 (2005).
- 619 32 Bartke, A. Healthy aging: is smaller better? - a mini-review. *Gerontology* **58**, 337-343,  
620 doi:10.1159/000335166 (2012).
- 621 33 Dai, H., Leeder, J. S. & Cui, Y. A modified generalized Fisher method for combining  
622 probabilities from dependent tests. *Front Genet* **5**, 32, doi:10.3389/fgene.2014.00032 (2014).
- 623 34 Blagosklonny, M. V. Aging: ROS or TOR. *Cell Cycle* **7**, 3344-3354, doi:10.4161/cc.7.21.6965  
624 (2008).
- 625 35 Blagosklonny, M. V. Answering the ultimate question "what is the proximal cause of aging?".  
626 *Aging (Albany NY)* **4**, 861-877, doi:10.18632/aging.100525 (2012).
- 627 36 Licastro, F. *et al.* Innate immunity and inflammation in ageing: a key for understanding age-  
628 related diseases. *Immun Ageing* **2**, 8, doi:10.1186/1742-4933-2-8 (2005).
- 629 37 Pitt, J. N. & Kaeberlein, M. Why is aging conserved and what can we do about it? *PLoS Biol*  
630 **13**, e1002131, doi:10.1371/journal.pbio.1002131 (2015).
- 631 38 Chung, H. Y. *et al.* Molecular inflammation: underpinnings of aging and age-related diseases.  
632 *Ageing Res Rev* **8**, 18-30, doi:10.1016/j.arr.2008.07.002 (2009).
- 633 39 Johnson, S. C., Rabinovitch, P. S. & Kaeberlein, M. mTOR is a key modulator of ageing and  
634 age-related disease. *Nature* **493**, 338-345, doi:10.1038/nature11861 (2013).

- 635 40 Kenyon, C. J. The genetics of ageing. *Nature* **464**, 504-512, doi:10.1038/nature08980 (2010).
- 636 41 Jung, C. H., Ro, S. H., Cao, J., Otto, N. M. & Kim, D. H. mTOR regulation of autophagy. *FEBS*
- 637 *Lett* **584**, 1287-1295, doi:10.1016/j.febslet.2010.01.017 (2010).
- 638 42 Rubinsztein, D. C., Marino, G. & Kroemer, G. Autophagy and aging. *Cell* **146**, 682-695,
- 639 doi:10.1016/j.cell.2011.07.030 (2011).
- 640 43 Bandyopadhyay, U., Kaushik, S., Varticovski, L. & Cuervo, A. M. The chaperone-mediated
- 641 autophagy receptor organizes in dynamic protein complexes at the lysosomal membrane.
- 642 *Mol Cell Biol* **28**, 5747-5763, doi:10.1128/MCB.02070-07 (2008).
- 643 44 Cuervo, A. M. & Dice, J. F. A receptor for the selective uptake and degradation of proteins by
- 644 lysosomes. *Science* **273**, 501-503 (1996).
- 645 45 Zhang, C. & Cuervo, A. M. Restoration of chaperone-mediated autophagy in aging liver
- 646 improves cellular maintenance and hepatic function. *Nat Med* **14**, 959-965,
- 647 doi:10.1038/nm.1851 (2008).
- 648 46 Kevei, E. & Hoppe, T. Ubiquitin sets the timer: impacts on aging and longevity. *Nat Struct Mol*
- 649 *Biol* **21**, 290-292, doi:10.1038/nsmb.2806 (2014).
- 650 47 Saez, I. & Vilchez, D. The Mechanistic Links Between Proteasome Activity, Aging and Age-
- 651 related Diseases. *Curr Genomics* **15**, 38-51, doi:10.2174/138920291501140306113344
- 652 (2014).
- 653 48 Chondrogianni, N., Petropoulos, I., Franceschi, C., Friguert, B. & Gonos, E. S. Fibroblast
- 654 cultures from healthy centenarians have an active proteasome. *Exp Gerontol* **35**, 721-728
- 655 (2000).
- 656 49 Lee, G. Y. *et al.* Comparative oncogenomics identifies PSMB4 and SHMT2 as potential cancer
- 657 driver genes. *Cancer Res* **74**, 3114-3126, doi:10.1158/0008-5472.CAN-13-2683 (2014).
- 658 50 Beck, B. D. *et al.* Human Pso4 is a metnase (SETMAR)-binding partner that regulates metnase
- 659 function in DNA repair. *J Biol Chem* **283**, 9023-9030, doi:10.1074/jbc.M800150200 (2008).
- 660 51 Zahn, J. M. *et al.* Transcriptional profiling of aging in human muscle reveals a common aging
- 661 signature. *PLoS Genet* **2**, e115, doi:10.1371/journal.pgen.0020115.eor (2006).
- 662 52 Ori, A. *et al.* Integrated Transcriptome and Proteome Analyses Reveal Organ-Specific
- 663 Proteome Deterioration in Old Rats. *Cell Syst* **1**, 224-237, doi:10.1016/j.cels.2015.08.012
- 664 (2015).
- 665 53 Reichwald, K. *et al.* Insights into Sex Chromosome Evolution and Aging from the Genome of a
- 666 Short-Lived Fish. *Cell* **163**, 1527-1538 (2015).
- 667 54 Janssens, G. E. *et al.* Protein biogenesis machinery is a driver of replicative aging in yeast.
- 668 *Elife* **4**, e08527, doi:10.7554/eLife.08527 (2015).
- 669 55 Baumgart, M. *et al.* Longitudinal RNA-Seq Analysis of Vertebrate Aging Identifies
- 670 Mitochondrial Complex I as a Small-Molecule-Sensitive Modifier of Lifespan. *Cell Syst* **2**, 122-
- 671 132, doi:10.1016/j.cels.2016.01.014 (2016).
- 672 56 Hansen, M. *et al.* Lifespan extension by conditions that inhibit translation in *Caenorhabditis*
- 673 *elegans*. *Aging Cell* **6**, 95-110, doi:10.1111/j.1474-9726.2006.00267.x (2007).
- 674 57 Hofmann, J. W. *et al.* Reduced expression of MYC increases longevity and enhances
- 675 healthspan. *Cell* **160**, 477-488, doi:10.1016/j.cell.2014.12.016 (2015).
- 676 58 Bratic, A. & Larsson, N. G. The role of mitochondria in aging. *J Clin Invest* **123**, 951-957,
- 677 doi:10.1172/JCI64125 (2013).
- 678 59 Bonawitz, N. D., Chatenay-Lapointe, M., Pan, Y. & Shadel, G. S. Reduced TOR signaling
- 679 extends chronological life span via increased respiration and upregulation of mitochondrial
- 680 gene expression. *Cell Metab* **5**, 265-277, doi:10.1016/j.cmet.2007.02.009 (2007).
- 681 60 Schieke, S. M. *et al.* The mammalian target of rapamycin (mTOR) pathway regulates
- 682 mitochondrial oxygen consumption and oxidative capacity. *J Biol Chem* **281**, 27643-27652,
- 683 doi:10.1074/jbc.M603536200 (2006).
- 684 61 Miwa, S. *et al.* Low abundance of the matrix arm of complex I in mitochondria predicts
- 685 longevity in mice. *Nat Commun* **5**, 3837, doi:10.1038/ncomms4837 (2014).

- 686 62 Dillin, A. *et al.* Rates of behavior and aging specified by mitochondrial function during  
687 development. *Science* **298**, 2398-2401, doi:10.1126/science.1077780 (2002).
- 688 63 Balaban, R. S., Nemoto, S. & Finkel, T. Mitochondria, oxidants, and aging. *Cell* **120**, 483-495,  
689 doi:10.1016/j.cell.2005.02.001 (2005).
- 690 64 Kim, G. H., Kim, J. E., Rhie, S. J. & Yoon, S. The Role of Oxidative Stress in Neurodegenerative  
691 Diseases. *Exp Neurobiol* **24**, 325-340, doi:10.5607/en.2015.24.4.325 (2015).
- 692 65 Barja, G. The mitochondrial free radical theory of aging. *Prog Mol Biol Transl Sci* **127**, 1-27,  
693 doi:10.1016/B978-0-12-394625-6.00001-5 (2014).
- 694 66 Umeda-Kameyama, Y. *et al.* Thioredoxin suppresses Parkin-associated endothelin receptor-  
695 like receptor-induced neurotoxicity and extends longevity in *Drosophila*. *J Biol Chem* **282**,  
696 11180-11187, doi:10.1074/jbc.M700937200 (2007).
- 697 67 Mitsui, A. *et al.* Overexpression of human thioredoxin in transgenic mice controls oxidative  
698 stress and life span. *Antioxid Redox Signal* **4**, 693-696, doi:10.1089/15230860260220201  
699 (2002).
- 700 68 Perez, V. I. *et al.* Thioredoxin 1 overexpression extends mainly the earlier part of life span in  
701 mice. *J Gerontol A Biol Sci Med Sci* **66**, 1286-1299, doi:10.1093/gerona/66.12.1286 (2011).
- 702 69 Flynn, J. M. & Melov, S. SOD2 in mitochondrial dysfunction and neurodegeneration. *Free*  
703 *Radic Biol Med* **62**, 4-12, doi:10.1016/j.freeradbiomed.2013.05.027 (2013).
- 704 70 Son, M., Fu, Q., Puttaparthi, K., Matthews, C. M. & Elliott, J. L. Redox susceptibility of SOD1  
705 mutants is associated with the differential response to CCS over-expression in vivo. *Neurobiol*  
706 *Dis* **34**, 155-162 (2009).
- 707 71 Andziak, B. & Buffenstein, R. Disparate patterns of age-related changes in lipid peroxidation  
708 in long-lived naked mole-rats and shorter-lived mice. *Aging Cell* **5**, 525-532,  
709 doi:10.1111/j.1474-9726.2006.00246.x (2006).
- 710 72 Andziak, B., O'Connor, T. P. & Buffenstein, R. Antioxidants do not explain the disparate  
711 longevity between mice and the longest-living rodent, the naked mole-rat. *Mech Ageing Dev*  
712 **126**, 1206-1212, doi:10.1016/j.mad.2005.06.009 (2005).
- 713 73 Andziak, B. *et al.* High oxidative damage levels in the longest-living rodent, the naked mole-  
714 rat. *Aging Cell* **5**, 463-471, doi:10.1111/j.1474-9726.2006.00237.x (2006).
- 715 74 Schmidt, C. M., Blount, J. D. & Bennett, N. C. Reproduction is associated with a tissue-  
716 dependent reduction of oxidative stress in eusocial female Damaraland mole-rats (*Fukomys*  
717 *damarensis*). *PLoS One* **9**, e103286, doi:10.1371/journal.pone.0103286 (2014).
- 718 75 Dammann, P. & Burda, H. Sexual activity and reproduction delay ageing in a mammal. *Curr*  
719 *Biol* **16**, R117-118, doi:10.1016/j.cub.2006.02.012 (2006).
- 720 76 Dammann, P., Sumner, R., Massmann, C., Scherag, A. & Burda, H. Extended longevity of  
721 reproductives appears to be common in *Fukomys* mole-rats (Rodentia, Bathyergidae). *PLoS*  
722 *One* **6**, e18757, doi:10.1371/journal.pone.0018757 (2011).
- 723 77 Schmidt, C. M., Bennett, N. C. & Jarvis, J. U. The long-lived queen: reproduction and longevity  
724 in female eusocial Damaraland mole-rats (*Fukomys damarensis*). *African Zoology* **48**, 193-  
725 196 (2013).
- 726 78 Vistoli, G. *et al.* Advanced glycoxidation and lipoxidation end products (AGEs and ALEs): an  
727 overview of their mechanisms of formation. *Free Radic Res* **47 Suppl 1**, 3-27,  
728 doi:10.3109/10715762.2013.815348 (2013).
- 729 79 Simm, A. *et al.* Protein glycation - Between tissue aging and protection. *Exp Gerontol* **68**, 71-  
730 75, doi:10.1016/j.exger.2014.12.013 (2015).
- 731 80 Dammann, P., Sell, D. R., Begall, S., Strauch, C. & Monnier, V. M. Advanced glycation end-  
732 products as markers of aging and longevity in the long-lived Ansell's mole-rat (*Fukomys*  
733 *anselli*). *J Gerontol A Biol Sci Med Sci* **67**, 573-583, doi:10.1093/gerona/67.5.573 (2012).
- 734 81 Helgadottir, A. *et al.* Variants with large effects on blood lipids and the role of cholesterol and  
735 triglycerides in coronary disease. *Nat Genet* **48**, 634-639, doi:10.1038/ng.3561 (2016).

- 736 82 Mahley, R. W. Central Nervous System Lipoproteins: ApoE and Regulation of Cholesterol  
737 Metabolism. *Arterioscler Thromb Vasc Biol* **36**, 1305-1315,  
738 doi:10.1161/ATVBAHA.116.307023 (2016).
- 739 83 Broer, L. *et al.* GWAS of longevity in CHARGE consortium confirms APOE and FOXO3  
740 candidacy. *J Gerontol A Biol Sci Med Sci* **70**, 110-118, doi:10.1093/gerona/glu166 (2015).
- 741 84 Macedo, M. F. & de Sousa, M. Transferrin and the transferrin receptor: of magic bullets and  
742 other concerns. *Inflamm Allergy Drug Targets* **7**, 41-52 (2008).
- 743 85 Hare, D., Ayton, S., Bush, A. & Lei, P. A delicate balance: Iron metabolism and diseases of the  
744 brain. *Front Aging Neurosci* **5**, 34, doi:10.3389/fnagi.2013.00034 (2013).
- 745 86 Jarvis, J. U. & Bennett, N. C. Eusociality has evolved independently in two genera of  
746 bathyergid mole-rats — but occurs in no other subterranean mammal. *Behavioral Ecology*  
747 *and Sociobiology* **33**, 253-260 (1993).
- 748 87 Burda, H., Honeycutt, R. L., Begall, S., Locker-Grütjen, O. & Scharff, A. Are naked and common  
749 mole-rats eusocial and if so, why? *Behavioral Ecology and Sociobiology* **47**, 293-303 (2000).
- 750 88 Sobrero, R., Inostroza-Michael, O., Hernandez, C. E. & Ebensperger, L. A. Phylogeny  
751 modulates the effects of ecological conditions on group living across hystricognath rodents.  
752 *Animal Behaviour* **94**, 27-34 (2014).
- 753 89 Smorkatcheva, A. V. & Lukhtanov, V. A. Evolutionary association between subterranean  
754 lifestyle and female sociality in rodents. *Mammalian Biology* **79**, 101-109 (2014).
- 755 90 Woodard, S. H. *et al.* Genes involved in convergent evolution of eusociality in bees. *Proc Natl*  
756 *Acad Sci U S A* **108**, 7472-7477, doi:10.1073/pnas.1103457108 (2011).
- 757 91 Malkki, H. Neurodevelopmental disorders: Impaired immune system function linked to social  
758 behaviour deficits in mice. *Nat Rev Neurol* **12**, 431, doi:10.1038/nrneurol.2016.109 (2016).
- 759 92 Estes, M. L. & McAllister, A. K. Immune mediators in the brain and peripheral tissues in  
760 autism spectrum disorder. *Nat Rev Neurosci* **16**, 469-486, doi:10.1038/nrn3978 (2015).
- 761 93 Nudel, R. *et al.* Associations of HLA alleles with specific language impairment. *J Neurodev*  
762 *Disord* **6**, 1, doi:10.1186/1866-1955-6-1 (2014).
- 763 94 Kodavali, C. V. *et al.* HLA associations in schizophrenia: are we re-discovering the wheel? *Am*  
764 *J Med Genet B Neuropsychiatr Genet* **165B**, 19-27, doi:10.1002/ajmg.b.32195 (2014).
- 765 95 Torres, A. R. *et al.* The association and linkage of the HLA-A2 class I allele with autism. *Hum*  
766 *Immunol* **67**, 346-351, doi:10.1016/j.humimm.2006.01.001 (2006).
- 767 96 Viljakainen, L. *et al.* Rapid evolution of immune proteins in social insects. *Mol Biol Evol* **26**,  
768 1791-1801, doi:10.1093/molbev/msp086 (2009).
- 769 97 Guruharsha, K. G., Kankel, M. W. & Artavanis-Tsakonas, S. The Notch signalling system:  
770 recent insights into the complexity of a conserved pathway. *Nat Rev Genet* **13**, 654-666,  
771 doi:10.1038/nrg3272 (2012).
- 772 98 Duncan, E. J., Hyink, O. & Dearden, P. K. Notch signalling mediates reproductive constraint in  
773 the adult worker honeybee. *Nat Commun* **7**, 12427, doi:10.1038/ncomms12427 (2016).
- 774 99 Frick, C., Atanasov, A. G., Arnold, P., Ozols, J. & Odermatt, A. Appropriate function of 11beta-  
775 hydroxysteroid dehydrogenase type 1 in the endoplasmic reticulum lumen is dependent on  
776 its N-terminal region sharing similar topological determinants with 50-kDa esterase. *J Biol*  
777 *Chem* **279**, 31131-31138, doi:10.1074/jbc.M313666200 (2004).
- 778 100 Clarke, F. M. & Faulkes, C. G. Dominance and queen succession in captive colonies of the  
779 eusocial naked mole-rat, *Heterocephalus glaber*. *Proc Biol Sci* **264**, 993-1000,  
780 doi:10.1098/rspb.1997.0137 (1997).
- 781 101 Hawes, D. J., Brennan, J. & Dadds, M. R. Cortisol, callous-unemotional traits, and pathways to  
782 antisocial behavior. *Curr Opin Psychiatry* **22**, 357-362, doi:10.1097/YCO.0b013e32832bfa6d  
783 (2009).
- 784 102 Sanchez-Martin, J. R. *et al.* Social behavior, cortisol, and sIgA levels in preschool children. *J*  
785 *Psychosom Res* **50**, 221-227 (2001).

- 786 103 Holmes, M. C., Kotelevtsev, Y., Mullins, J. J. & Seckl, J. R. Phenotypic analysis of mice bearing  
787 targeted deletions of 11beta-hydroxysteroid dehydrogenases 1 and 2 genes. *Mol Cell*  
788 *Endocrinol* **171**, 15-20 (2001).
- 789 104 Anderson, A. & Walker, B. R. 11beta-HSD1 inhibitors for the treatment of type 2 diabetes and  
790 cardiovascular disease. *Drugs* **73**, 1385-1393, doi:10.1007/s40265-013-0112-5 (2013).
- 791 105 Fritz-Wolf, K., Kehr, S., Stumpf, M., Rahlfs, S. & Becker, K. Crystal structure of the human  
792 thioredoxin reductase-thioredoxin complex. *Nat Commun* **2**, 383, doi:10.1038/ncomms1382  
793 (2011).
- 794 106 Weichsel, A., Gasdaska, J. R., Powis, G. & Montfort, W. R. Crystal structures of reduced,  
795 oxidized, and mutated human thioredoxins: evidence for a regulatory homodimer. *Structure*  
796 **4**, 735-751 (1996).
- 797 107 Hwang, J., Nguyen, L. T., Jeon, Y. H., Lee, C. Y. & Kim, M. H. Crystal structure of fully oxidized  
798 human thioredoxin. *Biochem Biophys Res Commun* **467**, 218-222,  
799 doi:10.1016/j.bbrc.2015.10.003 (2015).
- 800 108 Watson, W. H. *et al.* Redox potential of human thioredoxin 1 and identification of a second  
801 dithiol/disulfide motif. *J Biol Chem* **278**, 33408-33415, doi:10.1074/jbc.M211107200 (2003).
- 802 109 Hashemy, S. I. & Holmgren, A. Regulation of the catalytic activity and structure of human  
803 thioredoxin 1 via oxidation and S-nitrosylation of cysteine residues. *J Biol Chem* **283**, 21890-  
804 21898, doi:10.1074/jbc.M801047200 (2008).
- 805 110 Wu, C. *et al.* Thioredoxin 1-mediated post-translational modifications: reduction,  
806 transnitrosylation, denitrosylation, and related proteomics methodologies. *Antioxid Redox*  
807 *Signal* **15**, 2565-2604, doi:10.1089/ars.2010.3831 (2011).
- 808 111 Hall, D. R. *et al.* The crystal and molecular structures of diferric porcine and rabbit serum  
809 transferrins at resolutions of 2.15 and 2.60 Å, respectively. *Acta Crystallogr D Biol Crystallogr*  
810 **58**, 70-80 (2002).
- 811 112 Medawar, P. B. An unsolved problem of biology. (*Printed lecture: University College London*)  
812 (1952).
- 813 113 Groenewoud, M. J. & Zwartkruis, F. J. Rheb and Rags come together at the lysosome to  
814 activate mTORC1. *Biochem Soc Trans* **41**, 951-955, doi:10.1042/BST20130037 (2013).
- 815 114 Bens, M. *et al.* FRAMA: from RNA-seq data to annotated mRNA assemblies. *BMC Genomics*  
816 **17**, 54, doi:10.1186/s12864-015-2349-8 (2016).
- 817 115 Stanke, M., Schoffmann, O., Morgenstern, B. & Waack, S. Gene prediction in eukaryotes with  
818 a generalized hidden Markov model that uses hints from external sources. *BMC*  
819 *Bioinformatics* **7**, 62, doi:10.1186/1471-2105-7-62 (2006).
- 820 116 Dobin, A. *et al.* STAR: ultrafast universal RNA-seq aligner. *Bioinformatics* **29**, 15-21,  
821 doi:10.1093/bioinformatics/bts635 (2013).
- 822 117 Kent, W. J. BLAT--the BLAST-like alignment tool. *Genome Res* **12**, 656-664,  
823 doi:10.1101/gr.229202. Article published online before March 2002 (2002).
- 824 118 Kapustin, Y., Souvorov, A., Tatusova, T. & Lipman, D. Splign: algorithms for computing spliced  
825 alignments with identification of paralogs. *Biol Direct* **3**, 20, doi:10.1186/1745-6150-3-20  
826 (2008).
- 827 119 Li, H. & Durbin, R. Fast and accurate short read alignment with Burrows-Wheeler transform.  
828 *Bioinformatics* **25**, 1754-1760, doi:10.1093/bioinformatics/btp324 (2009).
- 829 120 Love, M. I., Huber, W. & Anders, S. Moderated estimation of fold change and dispersion for  
830 RNA-seq data with DESeq2. *Genome Biol* **15**, 550, doi:10.1186/s13059-014-0550-8 (2014).
- 831 121 Luo, W., Friedman, M. S., Shedden, K., Hankenson, K. D. & Woolf, P. J. GAGE: generally  
832 applicable gene set enrichment for pathway analysis. *BMC Bioinformatics* **10**, 161,  
833 doi:10.1186/1471-2105-10-161 (2009).
- 834 122 Supek, F., Bosnjak, M., Skunca, N. & Smuc, T. REVIGO summarizes and visualizes long lists of  
835 gene ontology terms. *PLoS One* **6**, e21800, doi:10.1371/journal.pone.0021800 (2011).

- 836 123 Arnold, K., Bordoli, L., Kopp, J. & Schwede, T. The SWISS-MODEL workspace: a web-based  
837 environment for protein structure homology modelling. *Bioinformatics* **22**, 195-201,  
838 doi:10.1093/bioinformatics/bti770 (2006).  
839 124 Biasini, M. *et al.* SWISS-MODEL: modelling protein tertiary and quaternary structure using  
840 evolutionary information. *Nucleic Acids Res* **42**, W252-258, doi:10.1093/nar/gku340 (2014).  
841 125 Pettersen, E. F. *et al.* UCSF Chimera--a visualization system for exploratory research and  
842 analysis. *J Comput Chem* **25**, 1605-1612, doi:10.1002/jcc.20084 (2004).

## 843 **Acknowledgements**

844 We thank Ivonne Görlich, Christiane Vole and Yoshiyuki Henning for excellent assistance, Debra Weih  
845 for proofreading the manuscript and Christoph Kaether for helpful discussions. This work was funded  
846 by the Deutsche Forschungsgemeinschaft (DFG, PL 173/8-1 and DA 992/3-1), the European  
847 Community's Seventh Framework Programme (FP7-HEALTH-2012-279281) as well as the Leibniz  
848 association (SAW-2012-FLI-2).

## 849 **Author contributions**

850 MP, PD and KS initiated the project. MP, AS and KS managed the project. PD, HB, TH, SH and MS  
851 provided samples; MGr was in charge for the sequencing; MB and AS performed assemblies and gene  
852 expression analyses; AS searched for PSGs; AS and HAK applied statistical tests; MGö performed  
853 protein structure modeling; AS, MP, PD, AC, HB, CC and CM interpreted the data; AS, MP, PD, AC and  
854 MGö wrote the manuscript. All authors read and approved the final manuscript.

## 855 **Competing interests**

856 The authors declare no competing financial interests.

## 857 **Corresponding author**

858 Correspondence to Arne Sahm ([arne.sahm@fli-leibniz.de](mailto:arne.sahm@fli-leibniz.de)).

## 859 **Supplementary information**

### 860 **Supplementary tables: S1-S24.xls**

861 Table S1. Data Sources for assemblies and sequence statistics.

862 Table S2. Samples that were sequenced to create genome/transcriptome assemblies.

863 Table S3. PSGs on multiple branches.

864 Table S4. Overview of positively selected genes ( $FDR \leq 0.05$ ) on examined branches.

865 Table S5. Results on branch 1.

866 Table S6. Results on branch 2.

867 Table S7. Results on branch 3.

868 Table S8. Results on branch 4.

869 Table S9. Results on branch 5.

870 Table S10. Results on branch 6.

871 Table S11. Results on branch 7.

872 Table S12. Results on branch 8.

873 Table S13. Results on branch 9.

874 Table S14. Results on branch 10.

875 Table S15. Results on branch 11.

876 Table S16. Overlaps between this and previous studies.

877 Table S17. Samples that were RNA-sequenced to examine gene regulation during aging.



878 Table S18. DESeq2 result for gene expression comparison of young ( $\emptyset$  3.42 years) vs. old (>21 years)  
879 naked mole-rats.

880 Table S19. DESeq2 result for gene expression comparison of young (6 months) vs. old (24 months)  
881 rats.

882 Table S20. GAGE gene ontology enrichment for expression changes during NMR aging ( $\emptyset$  3.42 vs > 21  
883 years, FDR $\leq$ 0.05, all down-regulated) .

884 Table S21. REVIGO treemap result of GAGE enrichment for differential expression during NMR aging.

885 Table S22. REVIGO representative categories (representative term given) of GAGE enrichment for  
886 differential expression during NMR aging.

887 Table S23. PSGs in aging relevant summarized REVIGO categories and quadrant 1 (up-regulated in rat  
888 and down-regulated in NMR).

889 Table S24. Gene ontologies enriched for PSGs on examined branches based on GOSTats and Fisher's  
890 exact test (FDR $\leq$ 0.05).

891

892 **Supplement data:** [ftp://genome.leibniz-fli.de/pub/mrps2017/supplement\\_data.tar.gz](ftp://genome.leibniz-fli.de/pub/mrps2017/supplement_data.tar.gz)

893

894 The package contains visualizations of alignments and positively selected sites for all genes and  
895 branches that were analyzed in this article.

896
